# Supplementary figures and images for: An integrated network platform for contextual prioritization of drugs and pathways
Source: Royal Society of Chemistry journal article supplement (doi:10.1039/c5mb00444f), 2015-08-19

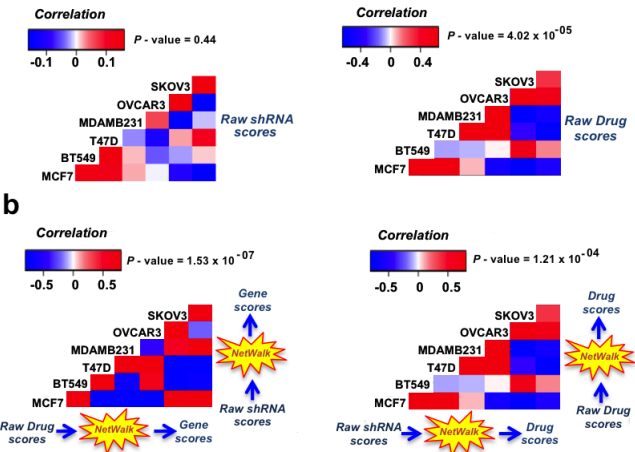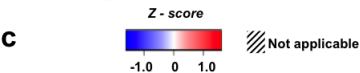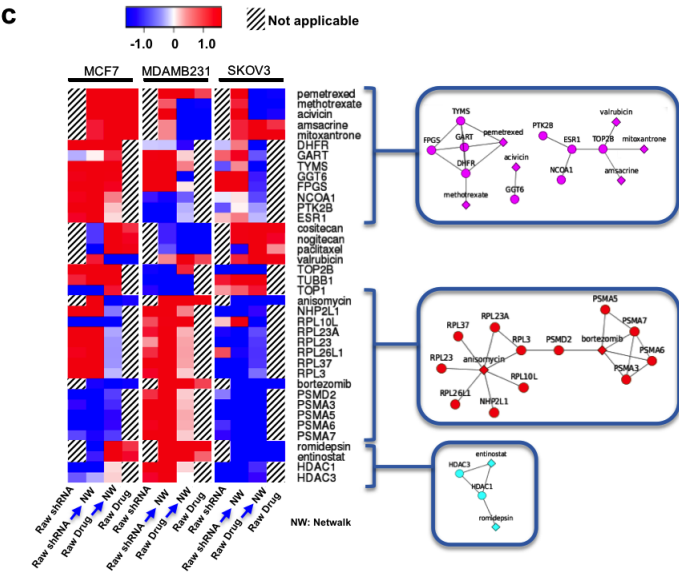

Supplement: c5mb00444f2.pdf [file c5mb00444f2.pdf]
